# Supplementary material
Source: Research Square preprint supplement (doi:10.21203/rs.3.rs-8939268/v1)
Supplement: Supplementary file 1 [file c27ef4ed7e2f23c3e2c6b723.docx]

**Supplementary information**

**Supplement 1**

| Supplement Table 1. The basic information of the blood samples of the children with ASD for NGS RNA sequencing |
| --- |
| |  | Sample ID | Sex | Age (years) | Diagnosis | CARS value | Seq. platform | | --- | --- | --- | --- | --- | --- | --- | | 1 | LB1230 | Male | 2.0 | ASD | 37.0 | NovaSeq X Plus | | 2 | LB333 | Male | 2.3 | ASD | 40.0 | NovaSeq X Plus | | 3 | LB1283 | Male | 2.7 | ASD | 37.0 | NovaSeq X Plus | | 4 | LB147 | Male | 3.1 | ASD | 39.0 | NovaSeq X Plus | | 5 | LB310 | Male | 3.2 | ASD | 37.0 | NovaSeq X Plus | | 6 | LB1246 | Male | 3.2 | ASD | 34.5 | NovaSeq X Plus | | 7 | LB342 | Female | 3.2 | ASD | 32.0 | NovaSeq X Plus | | 8 | LB181 | Male | 3.3 | ASD | 37.0 | NovaSeq X Plus | | 9 | LB1259 | Male | 3.3 | ASD | 34.0 | NovaSeq X Plus | | 10 | LB150 | Male | 3.4 | ASD | 35.5 | NovaSeq X Plus | | 11 | LB348 | Male | 3.5 | ASD | 39.0 | NovaSeq X Plus | | 12 | LB1249 | Male | 3.6 | ASD | 32.0 | NovaSeq X Plus | | 13 | LB167 | Male | 3.6 | ASD | 38.0 | NovaSeq X Plus | | 14 | LB438 | Male | 3.7 | ASD | 34.5 | NovaSeq X Plus | | 15 | LB257 | Male | 3.9 | ASD | 32.0 | NovaSeq X Plus | | 16 | LB485 | Male | 3.9 | ASD | 33.0 | NovaSeq X Plus | | 17 | LB146 | Female | 4.0 | ASD | 35.0 | NovaSeq X Plus | | 18 | LB1211 | Male | 4.0 | ASD | 33.0 | NovaSeq X Plus | | 19 | LB1229 | Male | 4.0 | ASD | 34.0 | NovaSeq X Plus | | 20 | LB184 | Male | 4.1 | ASD | 33.0 | NovaSeq X Plus | | 21 | LB451 | Male | 4.2 | ASD | 37.0 | NovaSeq X Plus | | 22 | LB452 | Male | 4.3 | ASD | 34.5 | NovaSeq X Plus | | 23 | LB1245 | Male | 4.4 | ASD | 30.0 | NovaSeq X Plus | | 24 | LB464 | Male | 4.6 | ASD | 38.0 | NovaSeq X Plus | | 25 | LB1268 | Female | 4.6 | ASD | 37.0 | NovaSeq X Plus | | 26 | LB1278 | Male | 4.6 | ASD | 35.5 | NovaSeq X Plus | | 27 | LB469 | Male | 4.8 | ASD | 35.5 | NovaSeq X Plus | | 28 | LB341 | Male | 5.0 | ASD | 30.0 | NovaSeq X Plus | | 29 | LB1214 | Male | 5.0 | ASD | 37.0 | NovaSeq X Plus | | 30 | LB1238 | Male | 5.0 | ASD | 34.5 | NovaSeq X Plus | | 31 | LB1239 | Female | 5.0 | ASD | 34.5 | NovaSeq X Plus | | 32 | LB205 | Male | 5.0 | ASD | 40.0 | NovaSeq X Plus | | 33 | LB1215 | Female | 5.0 | ASD | 34.0 | NovaSeq X Plus | | 34 | LB197 | Male | 5.1 | ASD | 34.0 | NovaSeq X Plus | | 35 | LB116 | Female | 5.2 | ASD | 34.0 | NovaSeq X Plus | | 36 | LB210 | Male | 5.3 | ASD | 39.0 | NovaSeq X Plus | | 37 | LB458 | Male | 5.3 | ASD | 33.5 | NovaSeq X Plus | | 38 | LB473 | Female | 5.5 | ASD | 38.5 | NovaSeq X Plus | | 39 | LB1261 | Male | 5.6 | ASD | 35.5 | NovaSeq X Plus | | 40 | LB382 | Male | 5.6 | ASD | 36.5 | NovaSeq X Plus | | 41 | LB490 | Female | 5.6 | ASD | 41.0 | NovaSeq X Plus | | 42 | LB442 | Male | 5.8 | ASD | 36.5 | NovaSeq X Plus | | 43 | LB1231 | Female | 6.0 | ASD | 39.0 | NovaSeq X Plus | | 44 | LB1210 | Male | 6.0 | ASD | 36.5 | NovaSeq X Plus | | 45 | LB152 | Male | 6.0 | ASD | 37.5 | NovaSeq X Plus | | 46 | LB1255 | Male | 6.1 | ASD | 31.0 | NovaSeq X Plus | | 47 | LB1109 | Male | 6.1 | ASD | 35.0 | NovaSeq X Plus | | 48 | LB232 | Male | 6.2 | ASD | 40.0 | NovaSeq X Plus | | 49 | LB430 | Male | 6.3 | ASD | 38.0 | NovaSeq X Plus | | 50 | LB440 | Male | 6.5 | ASD | 35.5 | NovaSeq X Plus | | 51 | LB465 | Male | 6.7 | ASD | 34.0 | NovaSeq X Plus | | 52 | LB1233 | Female | 7.0 | ASD | 36.0 | NovaSeq X Plus | | 53 | LB1212 | Male | 7.0 | ASD | 36.5 | NovaSeq X Plus | | 54 | LB431 | Male | 7.0 | ASD | 36.0 | NovaSeq X Plus | | 55 | LB495 | Male | 7.3 | ASD | 35.5 | NovaSeq X Plus | | 56 | LB426 | Male | 7.8 | ASD | 30.0 | NovaSeq X Plus | | 57 | LB1208 | Male | 8.0 | ASD | 35.0 | NovaSeq X Plus | | 58 | LB1207 | Male | 8.0 | ASD | 35.0 | NovaSeq X Plus | | 59 | LB1232 | Male | 8.0 | ASD | 31.5 | NovaSeq X Plus | | 60 | LB383 | Male | 8.1 | ASD | 42.0 | NovaSeq X Plus | |  | Average |  | 5.0 |  | 35.6 |  | |  | SD |  | 1.5 |  | 2.7 |  | |

**Supplement 2**

| Supplement Table 2. The basic information of the blood samples of the children with ASD for PB long read RNA sequencing |
| --- |
| |  | Sample ID | Sex | Age (years) | Diagnosis | CARS value | Seq. platform | | --- | --- | --- | --- | --- | --- | --- | | 1 | LB1230 | Male | 2.0 | ASD | 37.0 | PB revio | | 2 | LB333 | Male | 2.3 | ASD | 40.0 | PB revio | | 3 | LB1283 | Male | 2.7 | ASD | 37.0 | PB revio | | 4 | LB398 | Male | 2.9 | ASD | 41.0 | PB revio | | 5 | LB147 | Male | 3.1 | ASD | 39.0 | PB revio | | 6 | LB342 | Female | 3.2 | ASD | 32.0 | PB revio | | 7 | LB1259 | Male | 3.3 | ASD | 34.0 | PB revio | | 8 | LB181 | Male | 3.3 | ASD | 37.0 | PB revio | | 9 | LB150 | Male | 3.4 | ASD | 35.5 | PB revio | | 10 | LB257 | Male | 3.9 | ASD | 32.0 | PB revio | | 11 | LB1211 | Male | 4.0 | ASD | 33.0 | PB revio | | 12 | LB1229 | Male | 4.0 | ASD | 34.0 | PB revio | | 13 | LB184 | Male | 4.1 | ASD | 33.0 | PB revio | | 14 | LB1243 | Female | 4.3 | ASD | 38.5 | PB revio | | 15 | LB452 | Male | 4.3 | ASD | 34.5 | PB revio | | 16 | LB1278 | Male | 4.6 | ASD | 35.5 | PB revio | | 17 | LB464 | Male | 4.6 | ASD | 38.0 | PB revio | | 18 | LB1268 | Female | 4.6 | ASD | 37.0 | PB revio | | 19 | LB469 | Male | 4.8 | ASD | 35.5 | PB revio | | 20 | LB1214 | Male | 5.0 | ASD | 37.0 | PB revio | | 21 | LB205 | Male | 5.0 | ASD | 40.0 | PB revio | | 22 | LB1215 | Female | 5.0 | ASD | 34.0 | PB revio | | 23 | LB1238 | Male | 5.0 | ASD | 34.5 | PB revio | | 24 | LB341 | Male | 5.0 | ASD | 30.0 | PB revio | | 25 | LB197 | Male | 5.1 | ASD | 34.0 | PB revio | | 26 | LB116 | Female | 5.2 | ASD | 34.0 | PB revio | | 27 | LB210 | Male | 5.3 | ASD | 39.0 | PB revio | | 28 | LB458 | Male | 5.3 | ASD | 33.5 | PB revio | | 29 | LB473 | Female | 5.5 | ASD | 38.5 | PB revio | | 30 | LB382 | Male | 5.6 | ASD | 36.5 | PB revio | | 31 | LB1210 | Male | 6.0 | ASD | 36.5 | PB revio | | 32 | LB152 | Male | 6.0 | ASD | 37.5 | PB revio | | 33 | LB1231 | Female | 6.0 | ASD | 39.0 | PB revio | | 34 | LB494 | Male | 6.0 | ASD | 32.0 | PB revio | | 35 | LB1109 | Male | 6.1 | ASD | 35.0 | PB revio | | 36 | LB1255 | Male | 6.1 | ASD | 31.0 | PB revio | | 37 | LB430 | Male | 6.3 | ASD | 38.0 | PB revio | | 38 | LB449 | Male | 6.3 | ASD | 33.0 | PB revio | | 39 | LB1212 | Male | 7.0 | ASD | 36.5 | PB revio | | 40 | LB431 | Male | 7.0 | ASD | 36.0 | PB revio | | 41 | LB1233 | Female | 7.0 | ASD | 36.0 | PB revio | | 42 | LB495 | Male | 7.3 | ASD | 35.5 | PB revio | | 43 | LB426 | Male | 7.8 | ASD | 30.0 | PB revio | | 44 | LB1207 | Male | 8.0 | ASD | 35.0 | PB revio | | 45 | LB1208 | Male | 8.0 | ASD | 35.0 | PB revio | | 46 | LB1232 | Male | 8.0 | ASD | 31.5 | PB revio | |  | Average |  | 5.1 |  | 35.5 |  | |  | SD |  | 1.6 |  | 2.7 |  | |

**Supplement 3**

| Supplement Table 3. The information of the healthy controls of the children NGS RNA sequencing data used as the controls |
| --- |
| |  | Blood sample | RNA-seq data | BioProject | Sequencing platform | | --- | --- | --- | --- | --- | | 1 | SAMN47132566 | [SRX27827918](https://www.ncbi.nlm.nih.gov/sra/SRX27827918%5baccn%5d) | [PRJNA1229581](https://www.ncbi.nlm.nih.gov/bioproject/PRJNA1229581) | MGISEQ-2000RS | | 2 | SAMN47132567 | [SRX27827917](https://www.ncbi.nlm.nih.gov/sra/SRX27827917%5baccn%5d) | [PRJNA1229581](https://www.ncbi.nlm.nih.gov/bioproject/PRJNA1229581) | MGISEQ-2000RS | | 3 | SAMN47132568 | [SRX27827916](https://www.ncbi.nlm.nih.gov/sra/SRX27827916%5baccn%5d) | [PRJNA1229581](https://www.ncbi.nlm.nih.gov/bioproject/PRJNA1229581) | MGISEQ-2000RS | | 4 | SAMN47132569 | [SRX27827915](https://www.ncbi.nlm.nih.gov/sra/SRX27827915%5baccn%5d) | [PRJNA1229581](https://www.ncbi.nlm.nih.gov/bioproject/PRJNA1229581) | MGISEQ-2000RS | | 5 | SAMN47132570 | [SRX27827914](https://www.ncbi.nlm.nih.gov/sra/SRX27827914%5baccn%5d) | [PRJNA1229581](https://www.ncbi.nlm.nih.gov/bioproject/PRJNA1229581) | MGISEQ-2000RS | | 6 | SAMN47132571 | [SRX27827913](https://www.ncbi.nlm.nih.gov/sra/SRX27827913%5baccn%5d) | [PRJNA1229581](https://www.ncbi.nlm.nih.gov/bioproject/PRJNA1229581) | MGISEQ-2000RS | | 7 | SAMN47132572 | [SRX27827912](https://www.ncbi.nlm.nih.gov/sra/SRX27827912%5baccn%5d) | [PRJNA1229581](https://www.ncbi.nlm.nih.gov/bioproject/PRJNA1229581) | MGISEQ-2000RS | | 8 | SAMN47132573 | [SRX27827911](https://www.ncbi.nlm.nih.gov/sra/SRX27827911%5baccn%5d) | [PRJNA1229581](https://www.ncbi.nlm.nih.gov/bioproject/PRJNA1229581) | MGISEQ-2000RS | | 9 | SRR28480519 | [SRX24083051](https://www.ncbi.nlm.nih.gov/sra/SRX24083051%5baccn%5d) | [PRJNA1092746](https://www.ncbi.nlm.nih.gov/bioproject/PRJNA1092746) | Illumina NovaSeq 6000 | | 10 | SRR28480520 | [SRX24083050](https://www.ncbi.nlm.nih.gov/sra/SRX24083050%5baccn%5d) | [PRJNA1092746](https://www.ncbi.nlm.nih.gov/bioproject/PRJNA1092746) | Illumina NovaSeq 6000 | | 11 | SRR28480521 | [SRX24083049](https://www.ncbi.nlm.nih.gov/sra/SRX24083049%5baccn%5d) | [PRJNA1092746](https://www.ncbi.nlm.nih.gov/bioproject/PRJNA1092746) | Illumina NovaSeq 6000 | | 12 | SRR28480522 | [SRX24083048](https://www.ncbi.nlm.nih.gov/sra/SRX24083048%5baccn%5d) | [PRJNA1092746](https://www.ncbi.nlm.nih.gov/bioproject/PRJNA1092746) | Illumina NovaSeq 6000 | | 13 | SRR28480523 | [SRX24083047](https://www.ncbi.nlm.nih.gov/sra/SRX24083047%5baccn%5d) | [PRJNA1092746](https://www.ncbi.nlm.nih.gov/bioproject/PRJNA1092746) | Illumina NovaSeq 6000 | | 14 | SRR5886346 | [SRX3052258](https://www.ncbi.nlm.nih.gov/sra/SRX3052258%5baccn%5d) | [PRJNA396725](https://www.ncbi.nlm.nih.gov/bioproject/PRJNA396725) | Illumina HiSeq 2000 | | 15 | SRR5886347 | [SRX3052259](https://www.ncbi.nlm.nih.gov/sra/SRX3052259%5baccn%5d) | [PRJNA396725](https://www.ncbi.nlm.nih.gov/bioproject/PRJNA396725) | Illumina HiSeq 2000 | | 16 | SRR5886348 | [SRX3052260](https://www.ncbi.nlm.nih.gov/sra/SRX3052260%5baccn%5d) | [PRJNA396725](https://www.ncbi.nlm.nih.gov/bioproject/PRJNA396725) | Illumina HiSeq 2000 | | 17 | SRR5886349 | [SRX3052261](https://www.ncbi.nlm.nih.gov/sra/SRX3052261%5baccn%5d) | [PRJNA396725](https://www.ncbi.nlm.nih.gov/bioproject/PRJNA396725) | Illumina HiSeq 2000 | |

**Supplement 4**

| Supplement Table 4. The information of the healthy controls of the adults PB long read RNA sequencing data used as the controls |
| --- |
| |  | Sample | RNA-seq data | Project | Sequencing platform | | --- | --- | --- | --- | --- | | 1 | ZF01-control1 | Blood |  | PB sequalI | | 2 | ZF02-control2 | Blood |  | PB sequalI | | 3 | D5-lymphocytes | Blood | Quartet* | PB sequalI | | 4 | D6-lymphocytes | Blood | Quartet* | PB sequalI | | 5 | F7-lymphocytes | Blood | Quartet* | PB sequalI | | 6 | M8-lymphocytes | Blood | Quartet* | PB sequalI | |

Quartet*: <https://chinese-quartet.org/#/dashboard>

**Supplement 5**

**Dysregulation of Previously Reported ASD-Associated Genes**

We identified a set of genes previously implicated in ASD (i.e., ADSL, CNTNAP2, GPLD1, NBPFs, PDP1, PTEN, RELN, and RNF135) and examined their expression patterns. Consistent with prior findings, RELN, GPLD1, and CNTNAP2 exhibited reduced expression in ASD samples, whereas ADSL and PTEN showed relatively higher levels across both NGS and PacBio datasets (sFig. 1). Furthermore, comparative analysis confirmed the downregulation of RELN and PTEN in children with ASD compared with healthy children—a trend also observed when compared with adult controls (sFig. 2).

Statistical analysis using edgeR (negative binomial model) identified genes with |logFC| ≥ 1 and p-value < .05 as significantly differentially expressed (sFig. 3). Key observations included:

RELN: This gene is significantly downregulated in children with ASD, compared with healthy children (logFC = -2.3, p = .002, FDR = 0.005); however, it is not significantly altered, compared with adults. This suggests a developmental-stage-specific role in ASD-related neurodevelopmental divergence.

PTEN: This gene is consistently downregulated in children with ASD compared to both healthy children (logFC = -0.7, p = .001, FDR = 0.002) and adults (logFC = -2.9, p < .001, FDR < 0.001). PTEN is a phosphatidylinositol phosphatase involved in critical signaling pathways; its reduced expression may contribute to the pathophysiology of ASD.

NBPF Family: NBPF1, NBPF3, NBPF8, NBPF9, NBPF10, and NBPF12 showed reduced expression in children with ASD. NBPF1, NBPF8, and NBPF10 were significantly downregulated in children with ASD compared with healthy children, and all six were markedly downregulated compared to adult controls (sFig. 3). The NBPF gene family, located primarily on chromosome 1 (sFig. 4), has been linked to neurodevelopmental disorders, and its dysregulation may influence brain development and cognitive function.

| 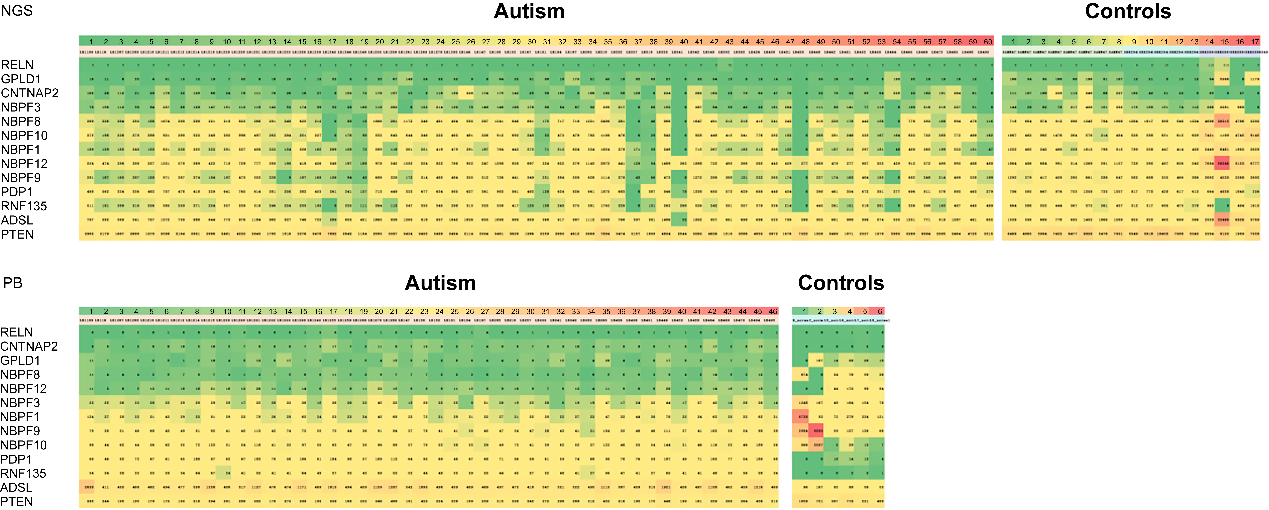 |
| --- |
| sFig 1. Differences in the expression levels of ASD-related candidate genes. The calculation results of NGS and PB sequencing data show that the gene-expression levels of RELN, GPLD1, and CNTNAP2 are low, while the expression levels of ADSL and PTEN are high. In the heatmap, the data are presented with colors ranging from green to red to indicate expression levels from low to high. In NGS testing, the gene-expression data of children with ASD (n = 60) were compared with those of the control group (n = 17). In the PB test, the gene-expression data of children with ASD (n = 46) were compared with gene-sequencing data from a control group of healthy individuals (n = 6), including two blood samples and the lymphocytes isolated from the blood of four healthy adults. |
| 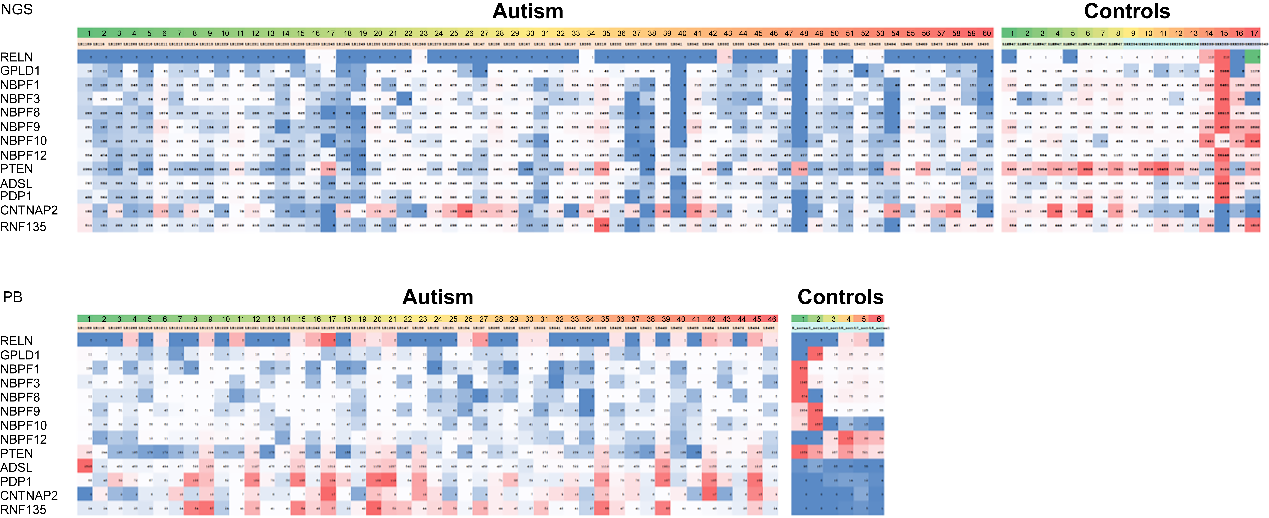 |
| sFig 2. Differential-expression levels shown in some ASD-related genes. The gene-expression levels of RELN and PTEN were low in the ASD group, while they were relatively high in the control sample (top graphic). Similar results were observed in the comparison between the ASD and control (adult) groups (bottom graphic). In the PB RNA controls, sequencing data were from two adults, while the rest were from lymphocyte cells isolated from four healthy adults. |

| 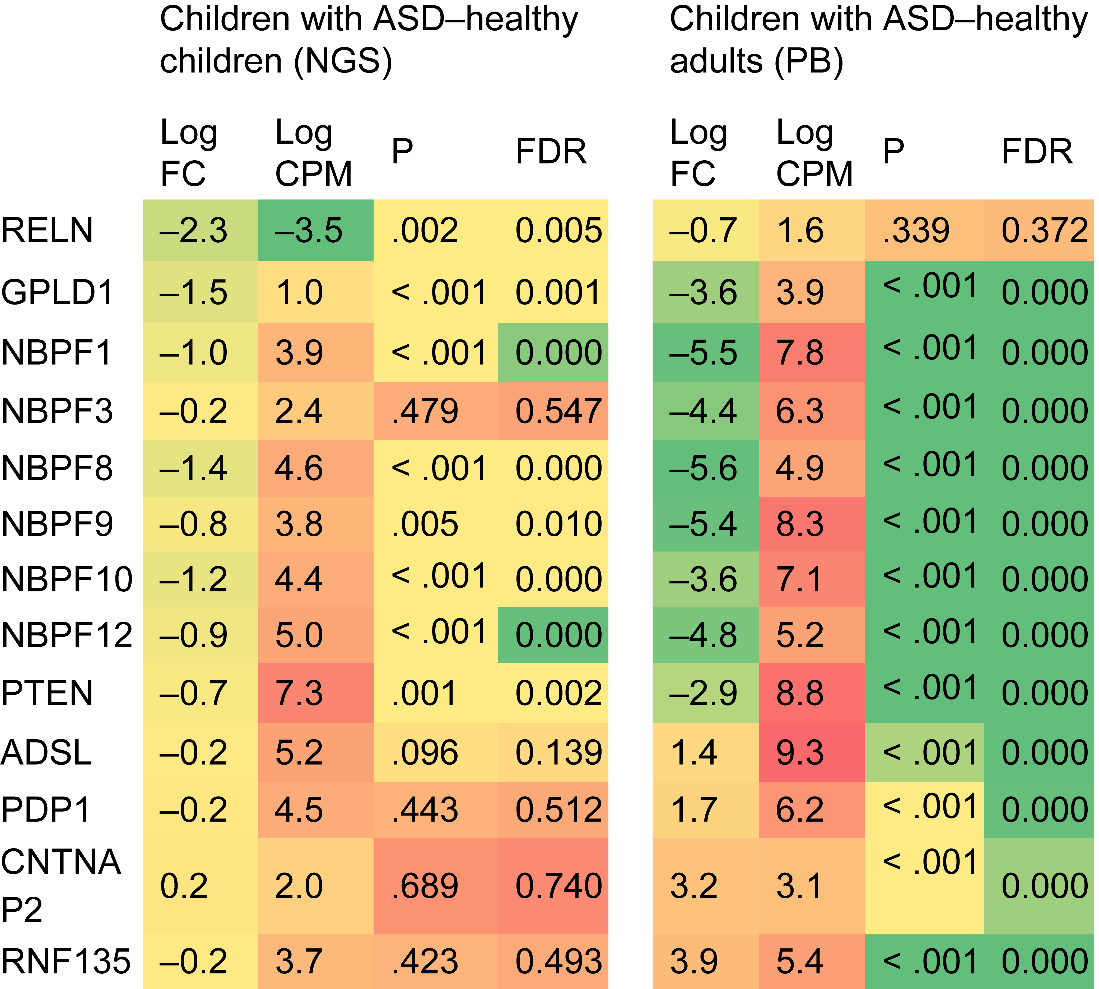 |
| --- |
| sFig 3. Differential-expression levels of ASD-related genes in children with ASD and controls (healthy children and adults). The logFC, logCPM, P value and FDR were indicated for each gene on this list. |
| 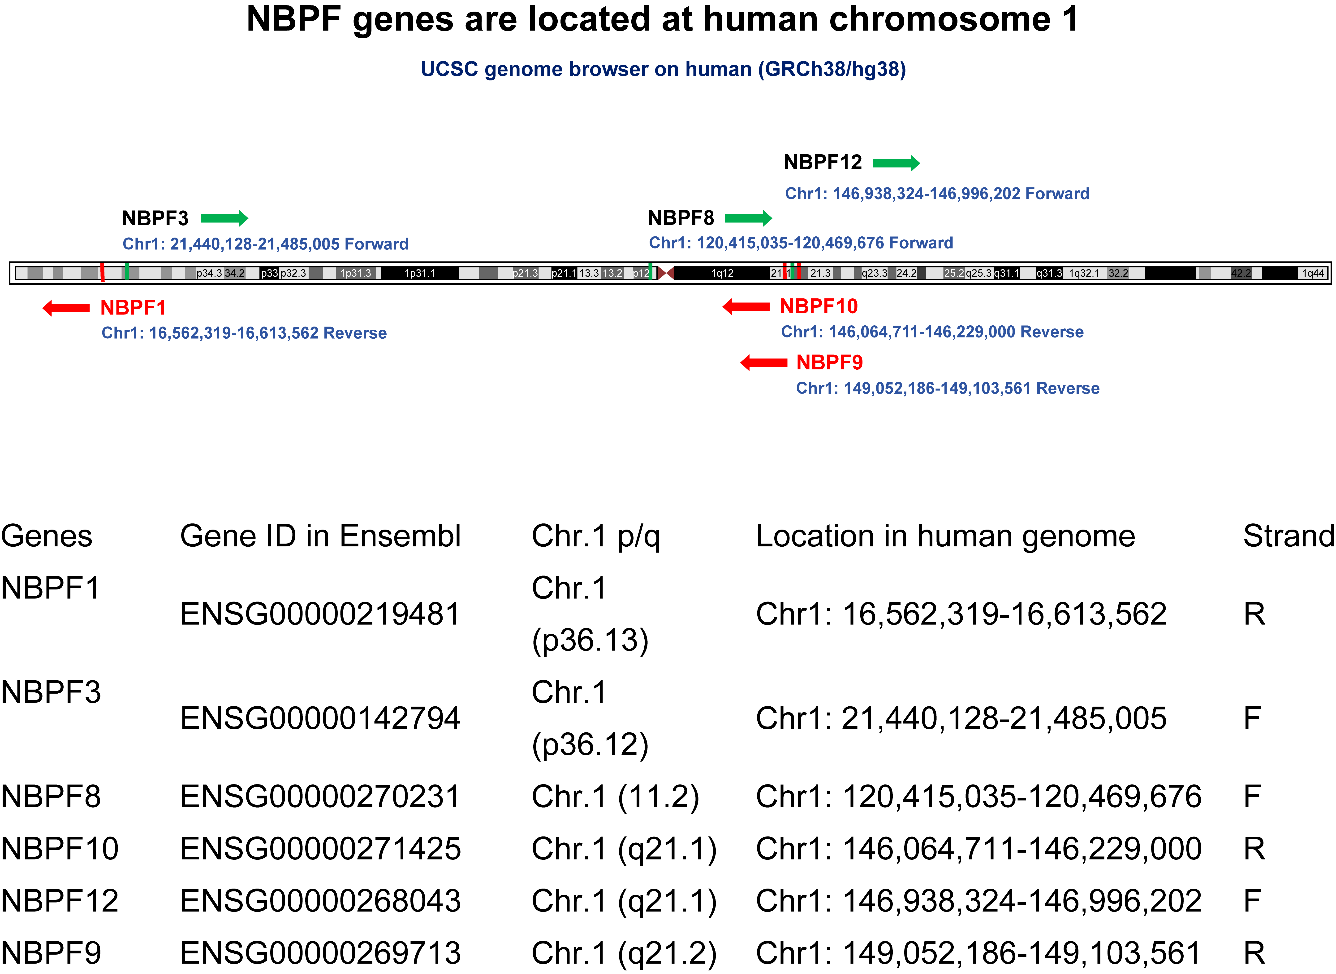 |
| sFig 4. Multiple genes of the neuroblastoma breakpoint family are located in human chromosome 1 (GRCh38:CM000663.2). |
|  |

**Supplement 6**

## **Shared transcriptional signatures between children with ASD and adolescents**


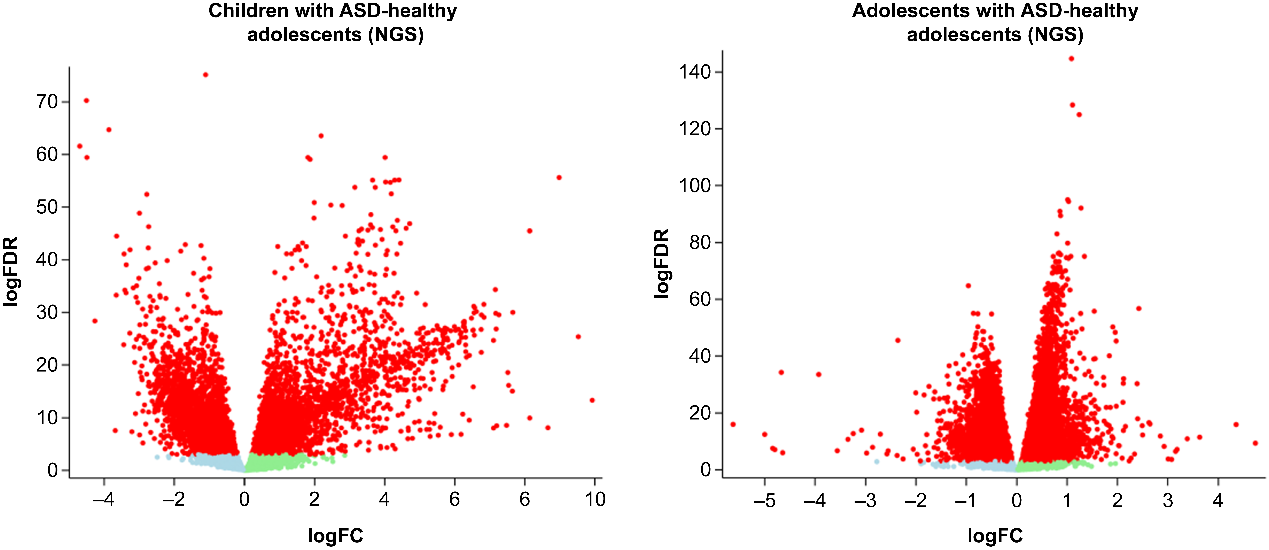


**sFig 5. Volcano plots showing significant changes (upregulated or downregulated) in gene expression in children or adolescents with ASD, compared with healthy adolescents.** The left panel shows the differential gene expression between children with ASD (n = 60) and healthy adolescents (n = 21). The control data were downloaded from the public database GenBank under project PRJNA925652. The right panel shows the differential gene expression between adolescents with ASD (n = 24) and healthy adolescents (n = 21). The raw data were also downloaded from GenBank (project PRJNA925652).


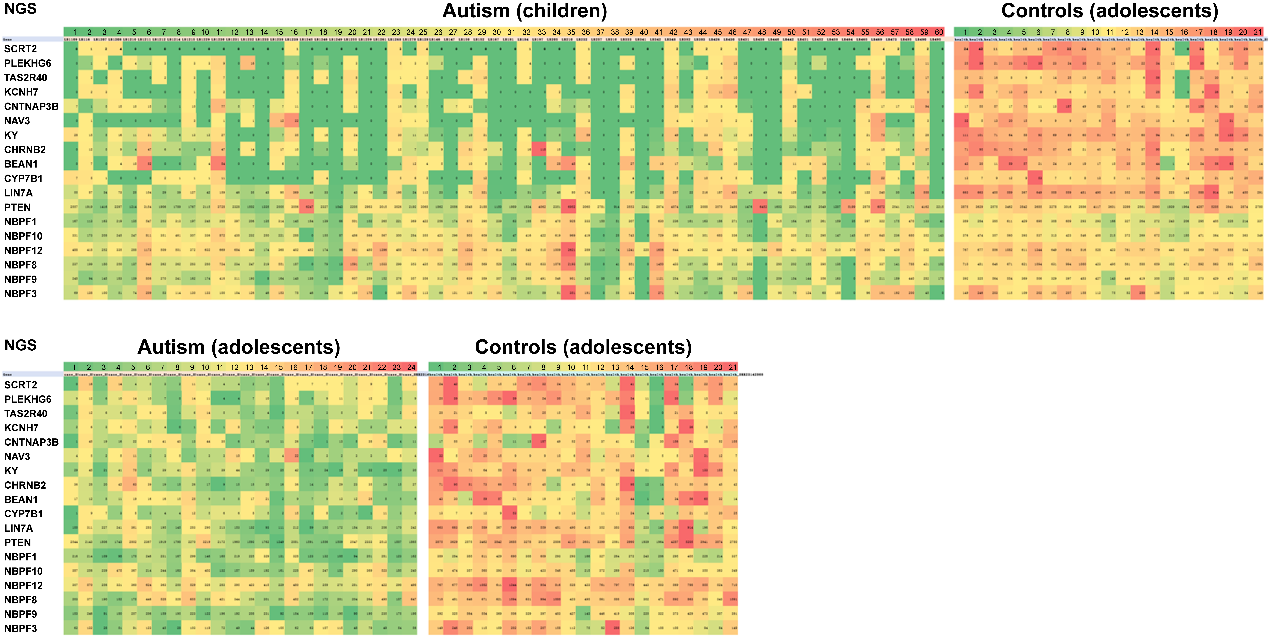


**sFig 6. Differential gene expression levels in children (n = 60) and adolescents (n = 24) with ASD, compared with healthy adolescents (n = 21).** The results showed that the SCART2 and certain genes exhibited low expression in children with ASD. Gene expression levels, from low to high, are indicated by colors ranging from green to red.


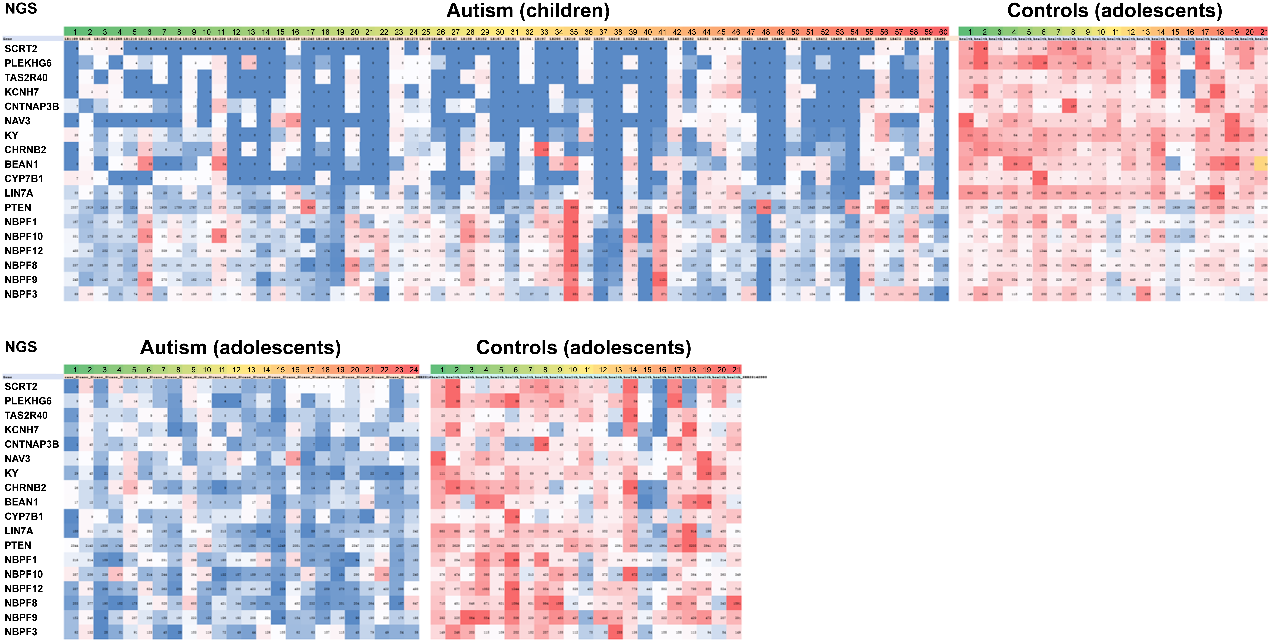


**sFig 7. Differential gene expression levels in children (n = 60) and adolescents (n = 24) with ASD, compared with healthy adolescents (n = 21).** The *SCART2* and certain genes exhibited low expression in children and adolescents with ASD. Gene expression levels, from low to high, are indicated by colors ranging from blue to red.


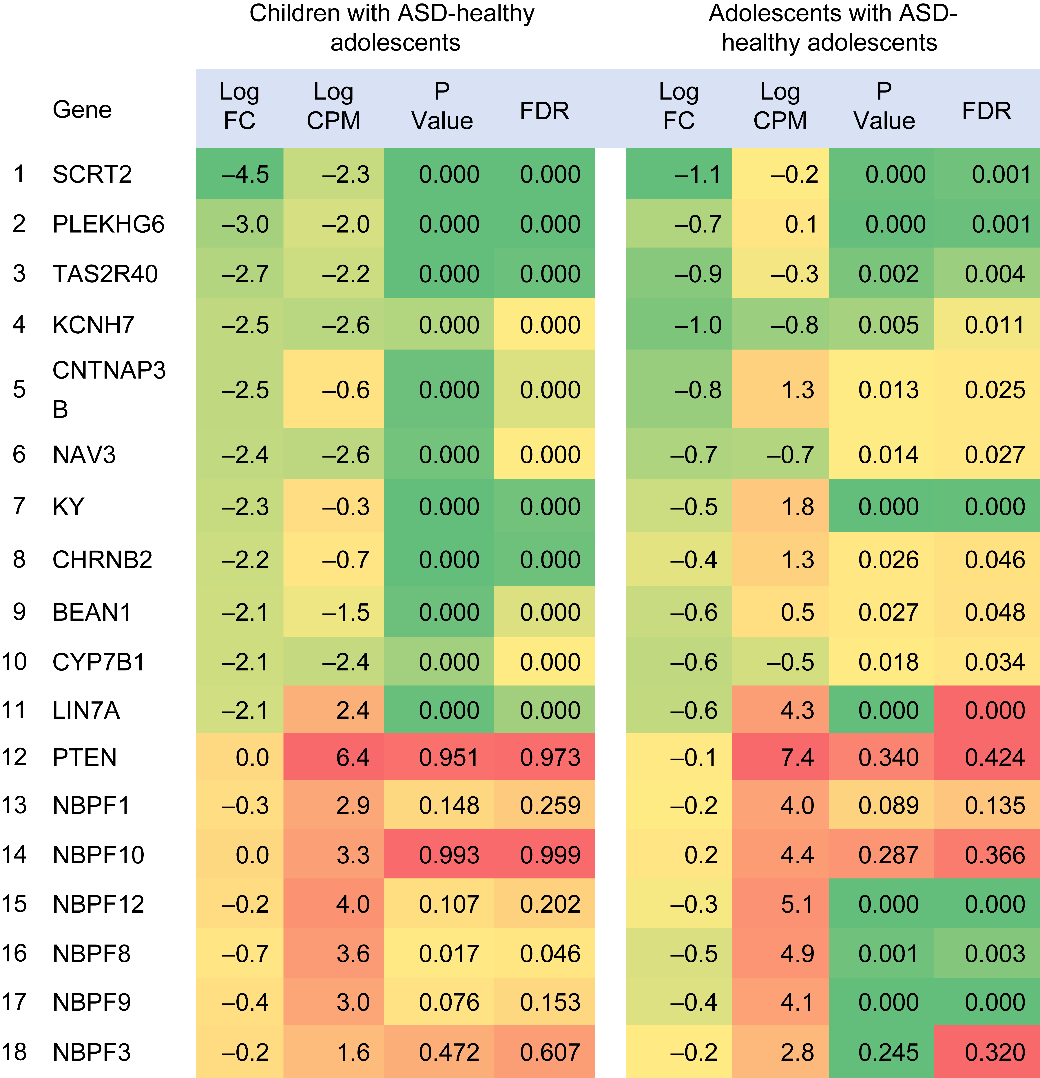


**sFig 8. Differential gene expression levels in children (n = 60) and adolescents (n = 24) with ASD, compared with healthy adolescents (n = 21).** The logFC, logCPM, P-value, and FDR are indicated for each gene.


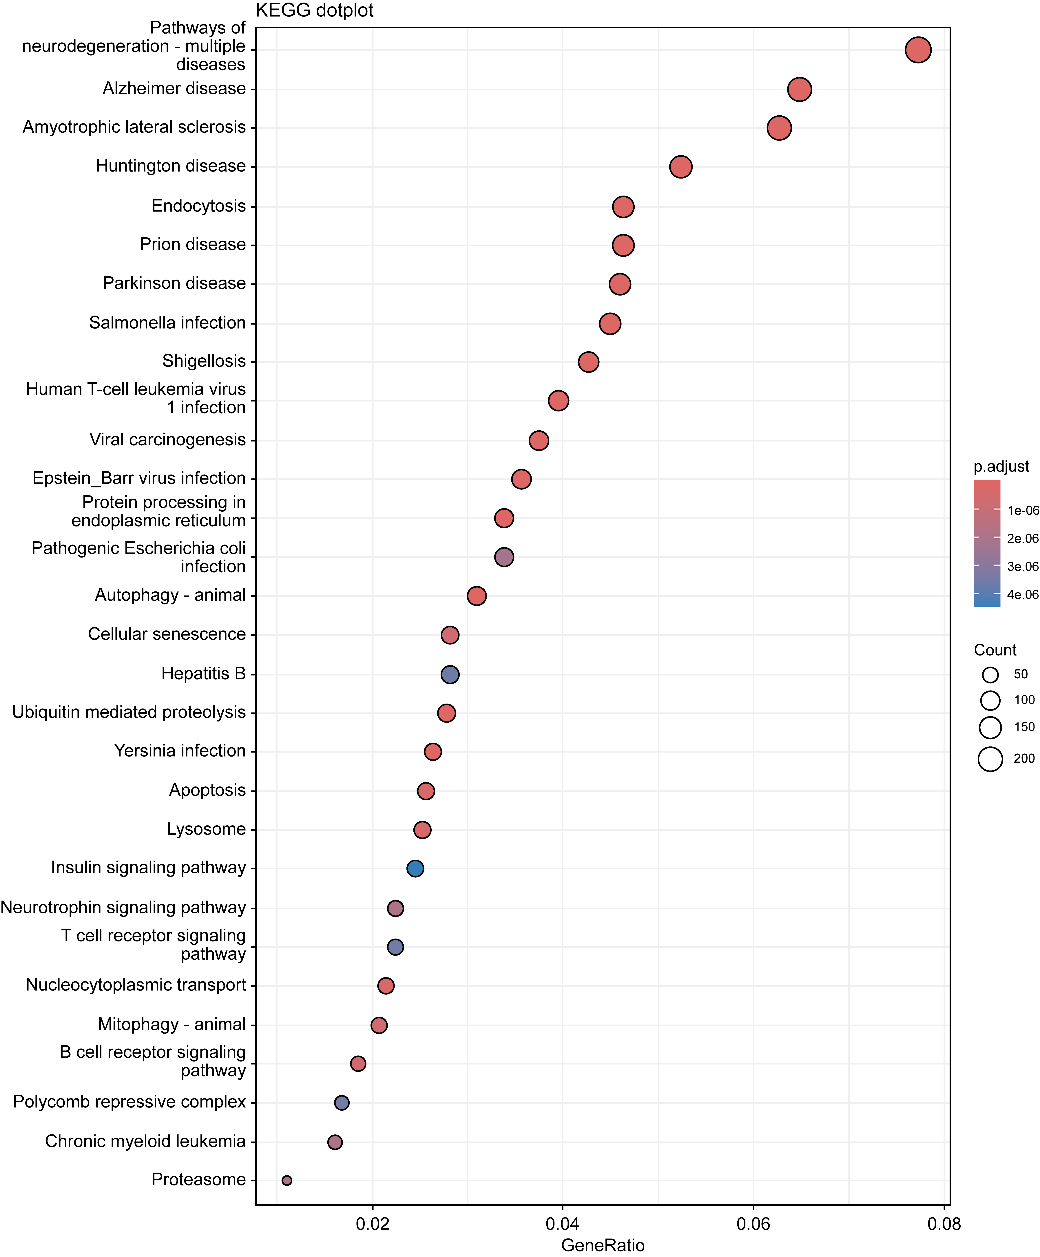


**sFig 9. Differential gene expression levels in adolescents with ASD (n = 24), compared with healthy adolescents (n = 21), in relation to neurogenerative diseases identified via KEGG pathway enrichment analysis.** These genes were mainly involved in neurodegenerative diseases, including amyotrophic lateral sclerosis and Alzheimer’s, Huntington’s, and Parkinson’s diseases. The raw RNA sequencing data were obtained from GenBank under the project PRJNA925652.


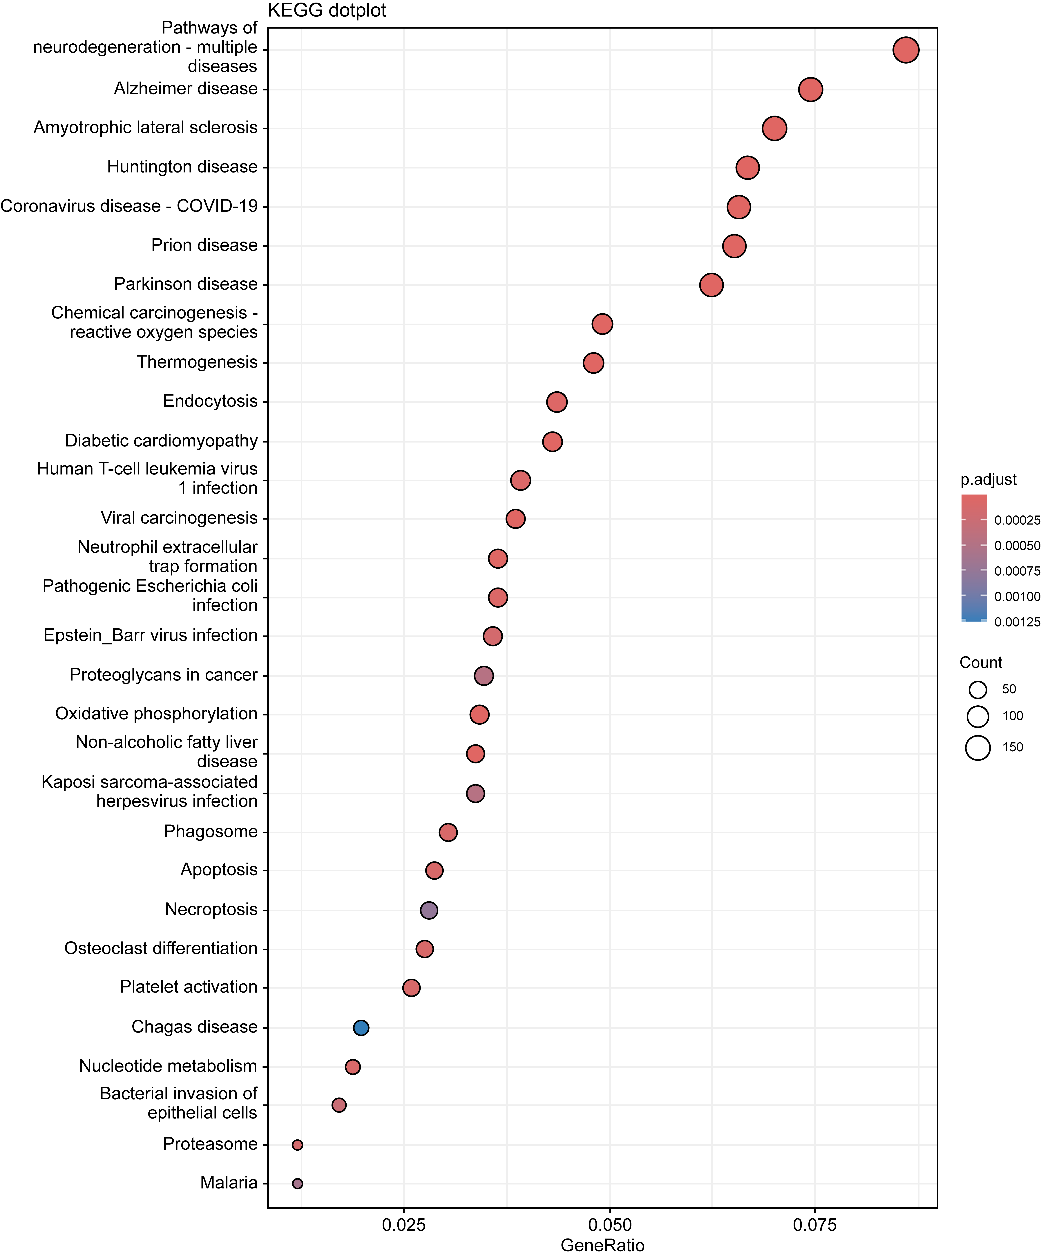


**sFig 10. Differential gene expression in children with ASD (n = 60), compared with healthy adolescents (n = 21) was identified via KEGG pathway enrichment analysis of neurodegenerative diseases.** They were mainly involved in the *neurodegeneration–multiple diseases* pathway, including amyotrophic lateral sclerosis, Alzheimer’s, Huntington’s, and Parkinson’s diseases. The control data were obtained from GenBank under the project PRJNA925652.

**Supplement 7**

## **Dysregulation of non-coding RNAs and immune-related genes**

| 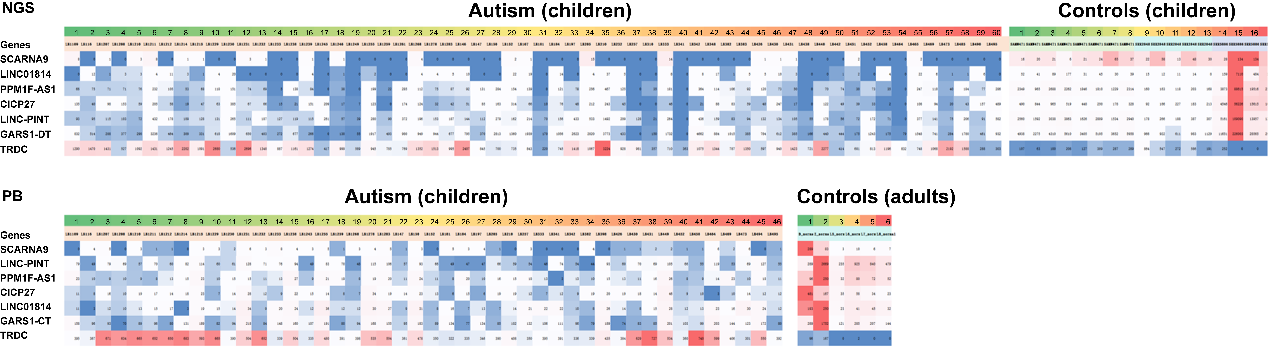 |
| --- |
| **sFig 11. Differential gene expression levels in non-coding and immune-related genes in the ASD and control groups of children and adults.** The non-coding gene expression levels of the *SCARNA9, LINC-PINT, PPM1F-AS1, CICP27, LINC01814*, and *GARS-DT* were low in the ASD group, while the TRDC (an immune reaction and protein coding gene) exhibited high expression. The results of both NGS and PB sequencing are shown in the heatmap. Gene expression levels, ranging from low to high, are indicated by colors from blue to red. In the NGS RNA sequencing analysis, children with ASD (n = 60) were compared to healthy children (n = 17). In the PB RNA sequencing analysis, children with ASD (n = 46) were compared with healthy adults (n = 6), of whom two were blood samples from adults and four were lymphocyte cells isolated from adult blood samples. |


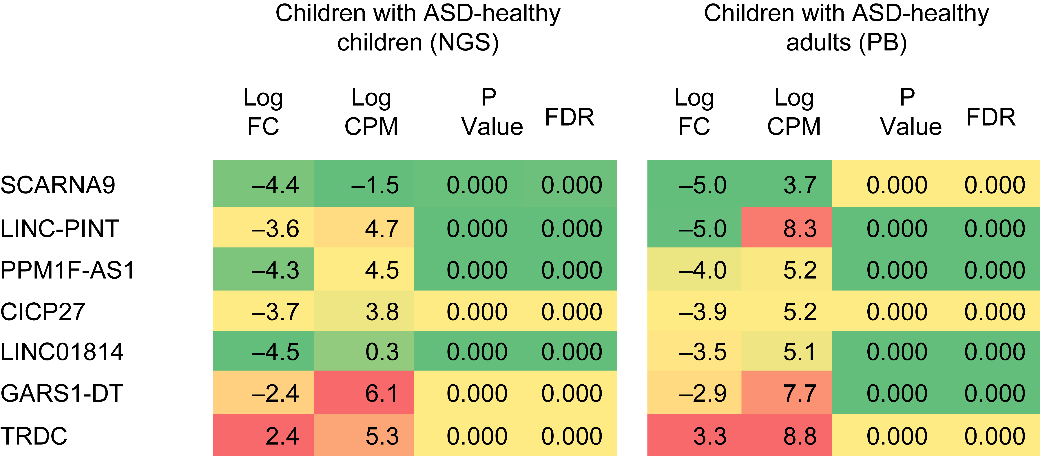


**sFig 12. Non-coding RNA genes and immune reaction genes’ expression in the ASD group, compared with controls.** The non-coding RNA genes and immune reaction genes exhibited low expression in the ASD groups. Left panel: Comparison between children with ASD (n = 60, age = 5.0 ± 1.5 years) and typically developing children (n = 17). Right panel: Comparison between children with ASD (n = 46, age = 5.1 ± 1.6 years) and healthy adults (n = 6, age = 30–60 years). Of the adult group samples, two were blood samples from adults, and four were lymphocyte cells isolated from adult blood samples. All individual RNA raw data were normalized using GAPDH gene expression levels.


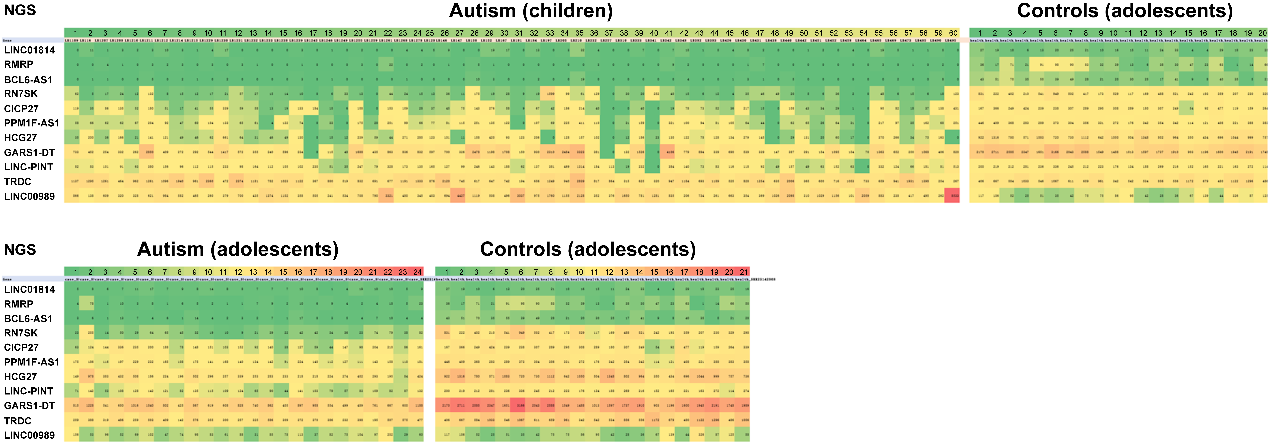


**sFig 13. Differential gene expression levels of regulatory genes, including non-coding genes, in children and adolescents with ASD compared to healthy adolescents.** The non-coding gene expression levels of *LINC01814, RMRP,* and *BCL6-AS1* were low compared to those of other genes in both the ASD and control groups. Gene expression levels, from low to high, are indicated by colors ranging from green to red. *RN7SK*’s gene expression levels in children and adolescents with ASD were lower than those in healthy adolescents.


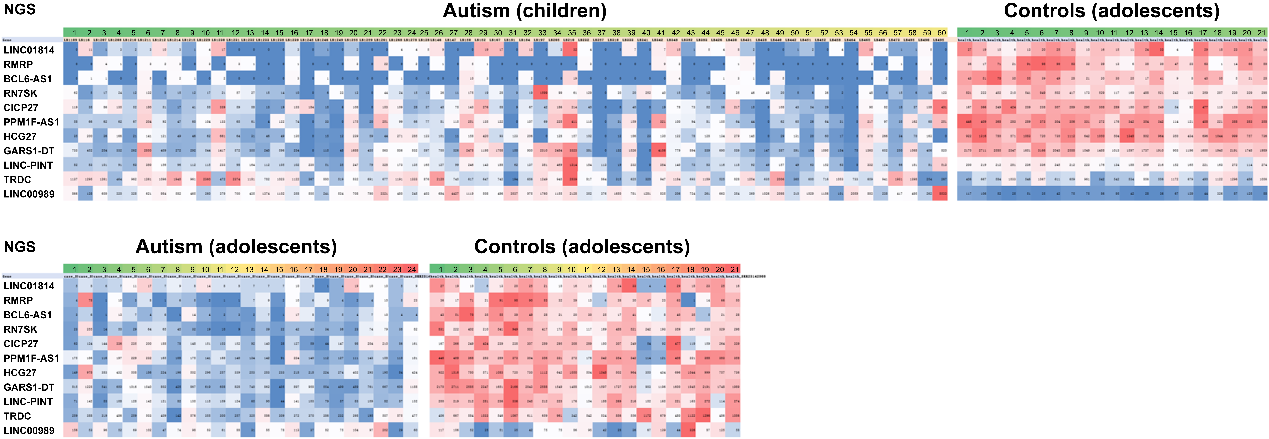


**sFig 14. Differential gene expression levels of regulatory genes, including non-coding genes, in children and adolescents with ASD compared with healthy adolescents.** The expression levels of the non-coding genes *LINC01814, RMRP, BCL6-AS1, RN7SK, CICP27, PPM1F-AS1, HCG27, GARS1-D, INC-PINT*, and the coding gene *TRDC* were low, while the expression level of the non-coding gene *LINC00989* was high in the ASD group compared with healthy adolescents. Gene expression levels, from low to high, are indicated by colors ranging from blue to red.


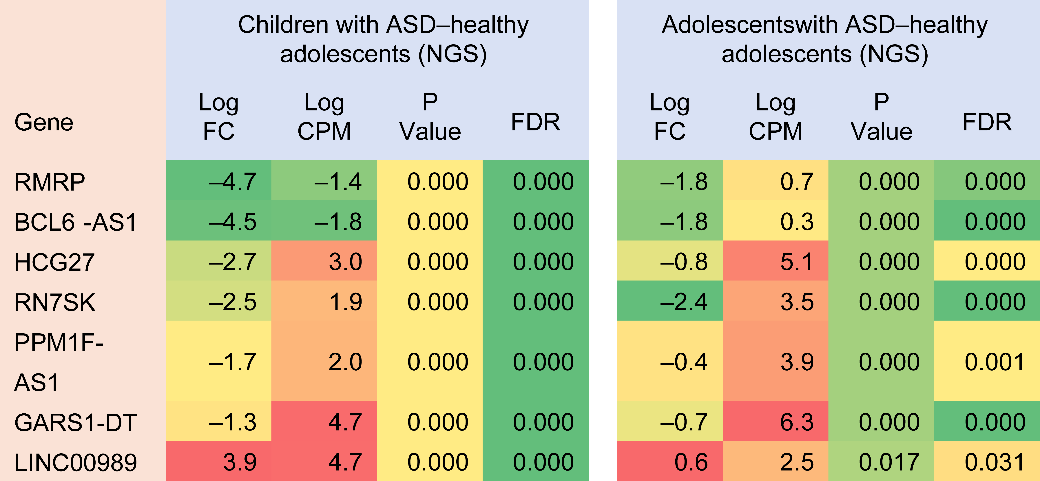


**sFig 15. Non-coding RNA genes show low expression in children and adolescents with ASD compared with healthy adolescents.** Left panel: Comparison between children with ASD (n = 60, age = 5.0 ± 1.5) and healthy adolescents (n = 21, age = 13.6 ± 0.5). Right panel: Comparison between adolescents with ASD (n = 24; age = 11.4 ± 1.6 years) and healthy adolescents (n = 21; age = 13.6 ± 0.5 years). All individual RNA raw data were normalized with respect to GAPDH gene expression levels.

**Supplement 8**

**Neurodegeneration as the Top-Ranked Pathway in ASD**

Comparative transcriptomic analyses consistently identified the neurodegeneration–multiple diseases pathway​ as the most significantly enriched KEGG pathway in children with ASD. This conclusion was independently corroborated across three distinct control comparisons with healthy children​ (n = 17; projects: PRJNA1229581, PRJNA1229581, and PRJNA1092746), healthy adolescents​ (n = 21; project: PRJNA925652), and healthy adults​ (n = 6).

To verify this finding, we performed a pooled analysis comparing all available ASD samples (N = 84) with a combined control cohort of healthy children and adolescents (N = 38), using uniformly processed NGS data. KEGG enrichment analysis of the resulting differentially expressed genes again identified the neurodegeneration–multiple diseases pathway as the top altered pathway (sFig. 16). Key associated conditions included ALS, Alzheimer’s, Huntington’s, and Parkinson’s diseases. Furthermore, this central neurodegenerative pathway exhibited significant connectivity with other neuronal disorders and related biological processes, underscoring its pivotal role in the ASD transcriptomic landscape (sFig. 17).

| 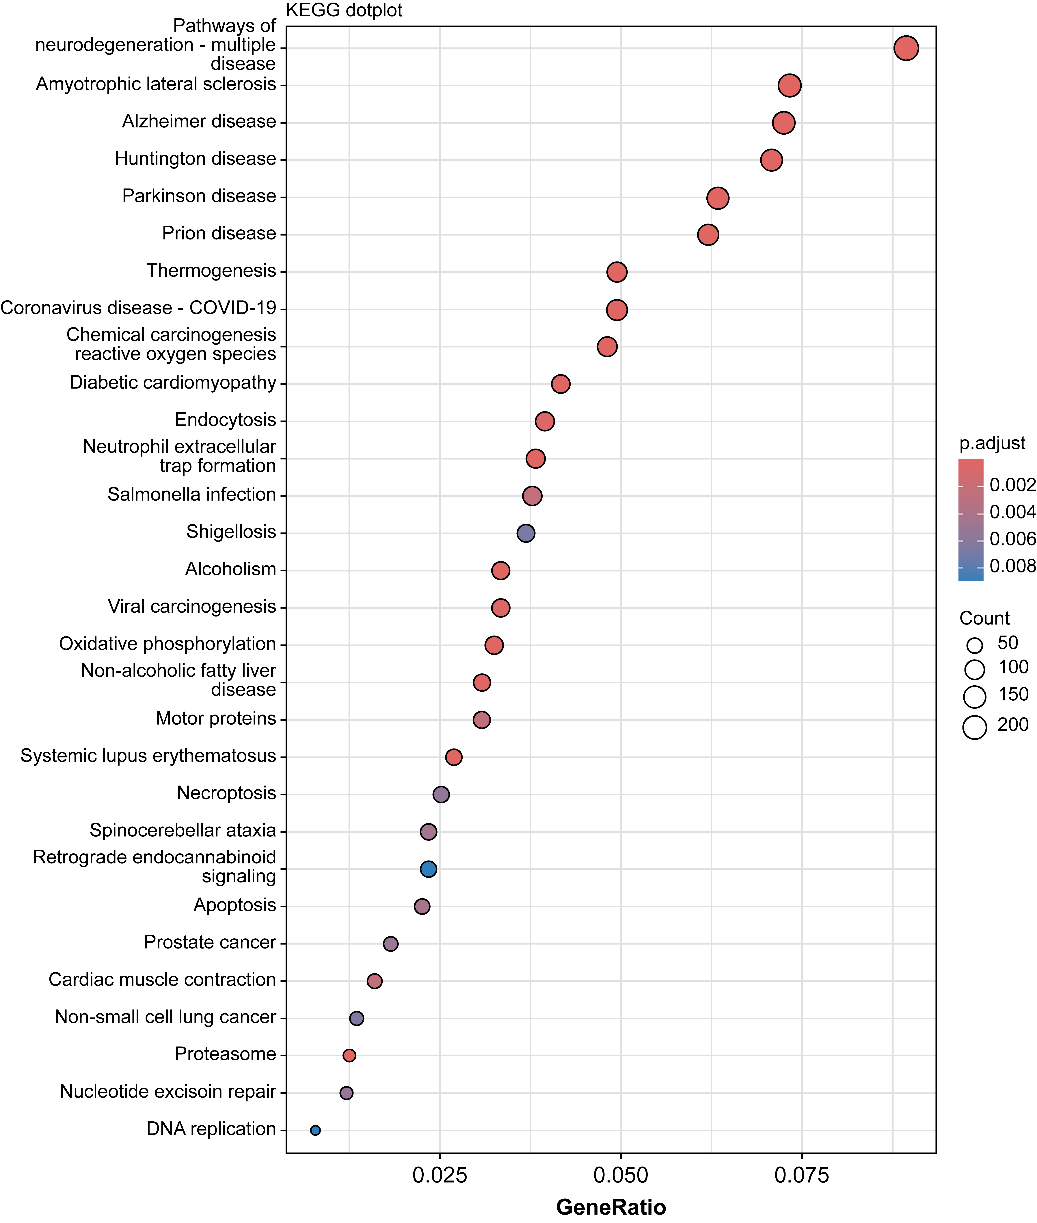 |
| --- |
| sFig 16. Results of KEGG pathway enrichment analysis of differentially expressed genes. The pathway of neurodegeneration – multiple diseases ranked first. The differentially expressed genes were identified by comparing RNA sequencing data between children and adolescents with ASD (n = 84) and healthy children and adolescents (n = 38). The findings also indicated other diseases, such as amyotrophic lateral sclerosis, Alzheimer’s disease, Huntington’s disease, and Parkinson’s disease. In this analysis, the data from adolescents with ASD (n = 24; under project PRJNA925652), healthy children (n = 17; under projects PRJNA229581, PRJNA1229581, and PRJNA1092746), and healthy adolescents (n = 21; under project PRJ1A925655) were used. All individual RNA raw data were normalized using GAPDH gene expression levels from children with ASD and subsequently analyzed in this study. |
| 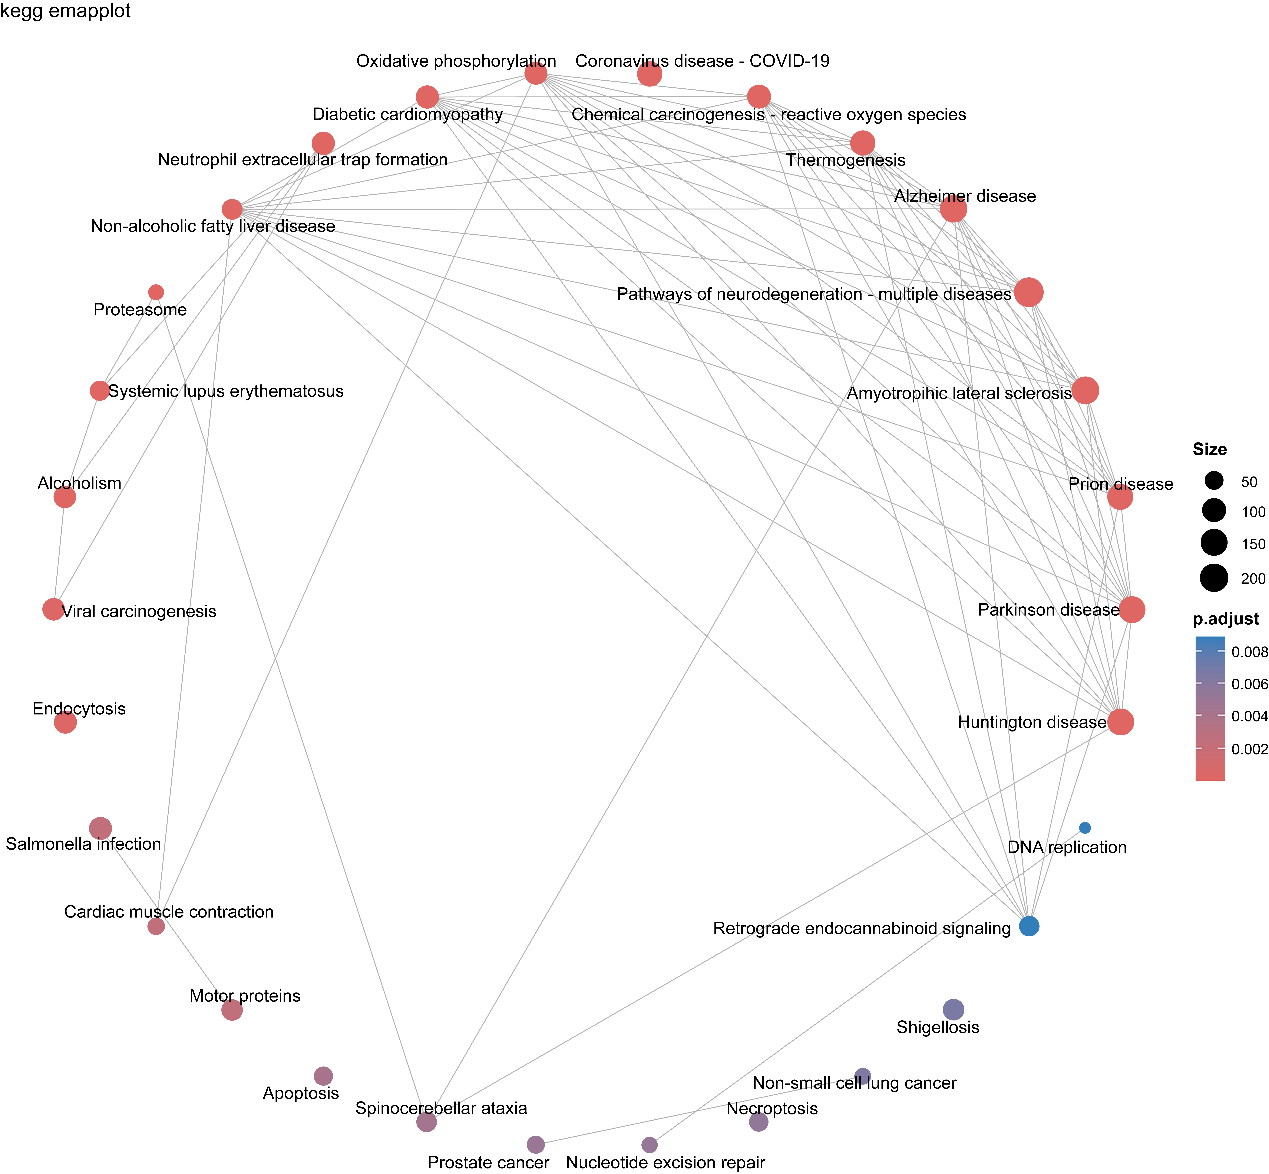 |
| sFig 17. Relationships and interactions in the neurodegeneration–multiple diseases pathway with other diseases and biological processes are shown in the Emapplot, which was obtained after KEGG pathway enrichment analysis using the differentially expressed genes. The differentially expressed genes were identified through an analysis of RNA sequencing data from children and adolescents with ASD (n = 84) and healthy children and adolescents (n = 38). The results of the KEGG pathway enrichment analysis showed that the pathway of neurodegeneration–multiple diseases interacted with amyotrophic lateral sclerosis, Alzheimer’s disease, Huntington’s disease, Parkinson’s disease, and other conditions. In this analysis, the data from adolescents with ASD (n = 24; under project PRJNA925652), healthy children (n = 17; under projects PRJNA229581, PRJNA1229581, and PRJNA1092746), and healthy adolescents (n = 21; under project PRJ1A925655) were used. All individual RNA raw data were normalized using GAPDH gene expression levels relative to the data from children with ASD and were subsequently analyzed. |
